# Supplementary material for: Platelet-Derived Microparticles From Obese Individuals: Characterization of Number, Size, Proteomics, and Crosstalk With Cancer and Endothelial Cells
Source: PubMed Central journal article supplement (PMC6349702; doi:10.3389/fphar.2019.00007), 2019-01-22
Supplement: Table_1.pdf [file Table_1.pdf]

Supplementary Table 1

| Gene names | Protein names                                                  | Protein IDs | Sequence coverage [%] | Unique sequence coverage [%] | Peptides | Unique peptides | Mol. weight [kDa] | Q-value | Score  | Intensity   | MS/MS count | Coefficient of variation |
|------------|----------------------------------------------------------------|-------------|-----------------------|------------------------------|----------|-----------------|-------------------|---------|--------|-------------|-------------|--------------------------|
| PDLIM1     | PDZ and LIM domain protein 1                                   | O00151      | 42,9                  | 42,9                         | 8        | 8               | 36,071            | 0       | 185,28 | 3511800000  | 146         | 0,428                    |
| CLIC1      | Chloride intracellular channel protein 1                       | O00299      | 73                    | 73                           | 13       | 13              | 26,922            | 0       | 300,19 | 6547100000  | 189         | 0,124                    |
| ADAM10     | Disintegrin and metalloproteinase domain-containing protein 10 | O14672      | 11,2                  | 11,2                         | 4        | 4               | 84,141            | 0       | 162,05 | 2014800000  | 97          | 0,229                    |
| MYL12A     | Myosin regulatory light chain 12A                              | P19105      | 8,2                   | 8,2                          | 1        | 1               | 19,794            | 0       | 52,977 | 814230000   | 26          | 1,904                    |
| FYB        | FYN-binding protein                                            | O15117      | 7                     | 7                            | 5        | 5               | 85,386            | 0       | 56,945 | 1097500000  | 62          | 1,259                    |
| ARPC1B     | Actin-related protein 2/3 complex subunit 1B                   | O15143      | 18,8                  | 18,8                         | 5        | 5               | 40,949            | 0       | 150,74 | 3377900000  | 78          | 0,201                    |
| ARPC2      | Actin-related protein 2/3 complex subunit 2                    | O15144      | 33,3                  | 33,3                         | 7        | 7               | 34,333            | 0       | 96,045 | 1774300000  | 58          | 1,233                    |
| ARPC5      | Actin-related protein 2/3 complex subunit 5                    | O15511      | 54,3                  | 54,3                         | 6        | 6               | 16,32             | 0       | 77,484 | 2309100000  | 73          | 1,412                    |
| ACTN4      | Alpha-actinin-4                                                | O43707      | 23,7                  | 12,5                         | 17       | 6               | 104,85            | 0       | 54,064 | 322720000   | 15          | 1,690                    |
| GMFG       | Glia maturation factor gamma                                   | O60234      | 37,3                  | 37,3                         | 4        | 4               | 16,801            | 0       | 103,65 | 550950000   | 28          | 2,151                    |
| WDR1       | WD repeat-containing protein 1                                 | O75083      | 62,9                  | 62,9                         | 26       | 26              | 66,193            | 0       | 323,31 | 10614000000 | 334         | 0,035                    |
| SKAP2      | Src kinase-associated phosphoprotein 2                         | O75563      | 17,3                  | 17,3                         | 6        | 6               | 41,216            | 0       | 94,998 | 624240000   | 35          | 1,852                    |
| TSPAN9     | Tetraspanin-9                                                  | O75954      | 7,5                   | 7,5                          | 2        | 2               | 26,779            | 0       | 38,621 | 425780000   | 18          | 1,201                    |
| PDE5A      | cGMP-specific 3,5-cyclic phosphodiesterase                     | O76074      | 5,7                   | 5,7                          | 4        | 4               | 99,984            | 0       | 27,096 | 126600000   | 9           | 2,138                    |
| SDPR       | Serum deprivation-response protein                             | O95810      | 21,4                  | 21,4                         | 7        | 7               | 47,173            | 0       | 178,24 | 2307900000  | 84          | 0,248                    |
| LDHA       | L-lactate dehydrogenase A chain                                | P00338      | 30,1                  | 30,1                         | 11       | 11              | 36,688            | 0       | 323,31 | 1653700000  | 97          | 0,649                    |
| *GSR       | Glutathione reductase, mitochondrial                           | P00390      | 5                     | 5                            | 2        | 2               | 56,256            | 0       | 17,8   | 102070000   | 13          | 1,852                    |
| F13A1      | Coagulation factor XIII A chain                                | P00488      | 21,3                  | 21,3                         | 15       | 15              | 83,266            | 0       | 323,31 | 5950500000  | 216         | 0,185                    |
| PNP        | Purine nucleoside phosphorylase                                | P00491      | 30,4                  | 30,4                         | 6        | 6               | 32,118            | 0       | 135,77 | 1120800000  | 55          | 0,868                    |
| PGK1       | Phosphoglycerate kinase 1                                      | P00558      | 72,2                  | 72,2                         | 23       | 23              | 44,614            | 0       | 323,31 | 5151000000  | 248         | 0,021                    |
| F2         | Prothrombin                                                    | P00734      | 8                     | 8                            | 3        | 3               | 70,036            | 0       | 45,972 | 556110000   | 36          | 1,852                    |
| CA2        | Carbonic anhydrase 2                                           | P00918      | 34,6                  | 34,6                         | 7        | 7               | 29,246            | 0       | 72,913 | 848600000   | 63          | 1,381                    |
| TGFB1      | Transforming growth factor beta-1                              | P01137      | 31                    | 31                           | 7        | 7               | 44,341            | 0       | 71,843 | 909980000   | 38          | 1,852                    |
| IGKC       | Ig kappa chain C region                                        | P01834      | 34                    | 34                           | 2        | 2               | 11,609            | 0       | 60,156 | 339090000   | 25          | 1,472                    |
| FGA        | Fibrinogen alpha chain                                         | P02671      | 7,9                   | 7,9                          | 5        | 5               | 94,972            | 0       | 51,211 | 634480000   | 45          | 1,852                    |
| FGB        | Fibrinogen beta chain                                          | P02675      | 12,2                  | 12,2                         | 4        | 4               | 55,928            | 0       | 34,953 | 314800000   | 16          | 1,852                    |
| FGG        | Fibrinogen gamma chain                                         | P02679      | 24,1                  | 24,1                         | 7        | 7               | 51,511            | 0       | 311,49 | 818430000   | 50          | 1,382                    |
| PPBP       | Platelet basic protein                                         | P02775      | 56,2                  | 56,2                         | 12       | 12              | 13,894            | 0       | 323,31 | 72157000000 | 448         | 0,062                    |
| PF4        | Platelet factor 4                                              | P02776      | 43,6                  | 11,9                         | 5        | 2               | 10,845            | 0       | 57,616 | 21706000000 | 56          | 1,852                    |
| TF         | Serotransferrin                                                | P02787      | 5                     | 5                            | 3        | 3               | 77,063            | 0       | 108,99 | 139820000   | 12          | 2,148                    |
| CAT        | Catalase                                                       | P04040      | 18,8                  | 18,8                         | 5        | 5               | 59,755            | 0       | 52,326 | 337300000   | 14          | 1,459                    |
| ALDOA      | Fructose-bisphosphate aldolase A                               | P04075      | 62,1                  | 62,1                         | 14       | 14              | 39,42             | 0       | 323,31 | 7766100000  | 177         | 0,267                    |
| GAPDH      | Glyceraldehyde-3-phosphate dehydrogenase                       | P04406      | 56,4                  | 56,4                         | 16       | 16              | 36,053            | 0       | 323,31 | 20923000000 | 366         | 0,011                    |
|            | Guanine nucleotide-binding protein G(i) subunit                |             |                       |                              |          |                 |                   |         |        |             |             |                          |
| GNAI2      | alpha-2                                                        | P04899      | 24,2                  | 24,2                         | 9        | 9               | 40,45             | 0       | 108,28 | 1044900000  | 48          | 1,412                    |
| APP        | Amyloid beta A4 protein                                        | P05067      | 4,9                   | 4,9                          | 2        | 2               | 86,942            | 0       | 34,867 | 142270000   | 16          | 2,828                    |
| ITGB3      | Integrin beta-3                                                | P05106      | 28,3                  | 28,3                         | 20       | 20              | 87,057            | 0       | 323,31 | 27803000000 | 340         | 0,028                    |
| *SLC25A5   | ADP/ATP translocase 2                                          | P05141      | 16,4                  | 9,7                          | 4        | 2               | 32,852            | 0       | 26,122 | 808900000   | 40          | 1,852                    |
| ITGB1      | Integrin beta-1                                                | P05556      | 22,7                  | 22,7                         | 13       | 13              | 88,414            | 0       | 209,36 | 2450500000  | 97          | 0,326                    |

|          |                                                                   |        |      |      |    |    |        |   |        |             |      |       |
|----------|-------------------------------------------------------------------|--------|------|------|----|----|--------|---|--------|-------------|------|-------|
| *ATP5B   | ATP synthase subunit beta, mitochondrial                          | P06576 | 10,2 | 10,2 | 4  | 4  | 56,559 | 0 | 37,112 | 962670000   | 31   | 1,852 |
| ENO1     | Alpha-enolase                                                     | P06733 | 85   | 78,8 | 26 | 24 | 47,168 | 0 | 323,31 | 11224000000 | 340  | 0,019 |
| GPI      | Glucose-6-phosphate isomerase                                     | P06744 | 29,4 | 29,4 | 11 | 11 | 63,146 | 0 | 163,74 | 1291600000  | 55   | 0,733 |
| TPM3     | Tropomyosin alpha-3 chain                                         | P06753 | 24,6 | 8,4  | 5  | 2  | 32,95  | 0 | 14,849 | 375150000   | 25   | 1,852 |
| LDHB     | L-lactate dehydrogenase B chain                                   | P07195 | 33,5 | 33,5 | 10 | 10 | 36,638 | 0 | 141,63 | 2045000000  | 122  | 0,246 |
| GPX1     | Glutathione peroxidase 1                                          | P07203 | 21,7 | 21,7 | 3  | 3  | 22,088 | 0 | 23,196 | 226950000   | 16   | 1,852 |
| PROS1    | Vitamin K-dependent protein S                                     | P07225 | 8,1  | 8,1  | 3  | 3  | 75,122 | 0 | 28,226 | 182590000   | 11   | 1,852 |
| P4HB     | Protein disulfide-isomerase                                       | P07237 | 10,6 | 10,6 | 4  | 4  | 57,116 | 0 | 49,233 | 409580000   | 33   | 1,852 |
| GP1BA    | Platelet glycoprotein Ib alpha chain                              | P07359 | 12,3 | 12,3 | 6  | 6  | 71,539 | 0 | 98,934 | 1092700000  | 59   | 1,143 |
| TUBB     | Tubulin beta chain                                                | P07437 | 58,3 | 17,3 | 14 | 4  | 49,67  | 0 | 323,31 | 6295600000  | 204  | 0,131 |
| PFN1     | Profilin-1                                                        | P07737 | 99,3 | 99,3 | 21 | 21 | 15,054 | 0 | 323,31 | 27216000000 | 335  | 0,019 |
| HSP90AA1 | Heat shock protein HSP 90-alpha                                   | P07900 | 11,3 | 9,7  | 7  | 6  | 84,659 | 0 | 112,5  | 685100000   | 34   | 1,852 |
| LYN      | Tyrosine-protein kinase Lyn                                       | P07948 | 27,9 | 27,9 | 9  | 8  | 58,573 | 0 | 79,908 | 618520000   | 35   | 1,915 |
| THBS1    | Thrombospondin-1                                                  | P07996 | 21,4 | 21,4 | 22 | 22 | 129,38 | 0 | 323,31 | 5551300000  | 227  | 0,331 |
| ITGA2B   | Integrin alpha-IIb                                                | P08514 | 22,1 | 22,1 | 16 | 16 | 113,38 | 0 | 323,31 | 22523000000 | 383  | 0,017 |
| PLEK     | Pleckstrin                                                        | P08567 | 51,4 | 51,4 | 17 | 17 | 40,124 | 0 | 323,31 | 6328200000  | 154  | 0,484 |
| *GSTP1   | Glutathione S-transferase P                                       | P09211 | 52,4 | 52,4 | 6  | 6  | 23,356 | 0 | 140,07 | 1940000000  | 88   | 0,430 |
| SPARC    | SPARC                                                             | P09486 | 23,4 | 23,4 | 4  | 4  | 34,632 | 0 | 126,85 | 2532500000  | 71   | 1,381 |
| TPM1     | Tropomyosin alpha-1 chain                                         | P09493 | 21,5 | 6    | 4  | 1  | 32,708 | 0 | 94,637 | 677850000   | 42   | 1,852 |
| HSPA1B   | Heat shock 70 kDa protein 1B                                      | P0DMV9 | 31,7 | 21,1 | 11 | 7  | 70,051 | 0 | 89,157 | 665860000   | 46   | 1,043 |
| TXN      | Thioredoxin                                                       | P10599 | 30,5 | 30,5 | 2  | 2  | 11,737 | 0 | 27,016 | 434100000   | 23   | 1,901 |
| PRKAR1A  | cAMP-dependent protein kinase type I-alpha regulatory subunit     | P10644 | 22,8 | 22,8 | 5  | 5  | 42,981 | 0 | 80,874 | 721550000   | 27   | 1,206 |
| PF4V1    | Platelet factor 4 variant                                         | P10720 | 56,7 | 26   | 6  | 3  | 11,553 | 0 | 159,47 | 43347000000 | 171  | 0,224 |
| *HSPD1   | 60 kDa heat shock protein, mitochondrial                          | P10809 | 11,2 | 11,2 | 5  | 5  | 61,054 | 0 | 38,955 | 485680000   | 37   | 1,852 |
| *CLU     | Clusterin                                                         | P10909 | 14,9 | 14,9 | 5  | 5  | 52,494 | 0 | 51,557 | 588810000   | 29   | 1,852 |
| HSPA5    | 78 kDa glucose-regulated protein                                  | P11021 | 25,1 | 22,6 | 12 | 11 | 72,332 | 0 | 197,81 | 1796600000  | 115  | 0,170 |
| HSPA8    | Heat shock cognate 71 kDa protein                                 | P11142 | 45,4 | 38,7 | 21 | 18 | 70,897 | 0 | 323,31 | 9665300000  | 294  | 0,024 |
| SLC2A3   | Solute carrier family 2, facilitated glucose transporter member 3 | P11169 | 21,8 | 21,8 | 6  | 6  | 53,924 | 0 | 143,58 | 1103600000  | 50   | 1,112 |
| RALB     | Ras-related protein Ral-B                                         | P11234 | 24,8 | 24,8 | 4  | 4  | 23,408 | 0 | 31,154 | 454400000   | 19   | 1,896 |
| ADH5     | Alcohol dehydrogenase class-3                                     | P11766 | 6,7  | 6,7  | 1  | 1  | 39,724 | 0 | 51,525 | 194510000   | 10   | 1,993 |
| F5       | Coagulation factor V                                              | P12259 | 3,1  | 3,1  | 5  | 5  | 251,7  | 0 | 96,358 | 1403400000  | 81   | 0,936 |
| ACTN1    | Alpha-actinin-1                                                   | P12814 | 54,9 | 45,6 | 38 | 27 | 103,06 | 0 | 323,31 | 20919000000 | 507  | 0,019 |
| *SRC     | Proto-oncogene tyrosine-protein kinase Src                        | P12931 | 22,6 | 22,6 | 8  | 7  | 59,834 | 0 | 93,863 | 850500000   | 41   | 1,200 |
| CCL5     | C-C motif chemokine 5                                             | P13501 | 40,7 | 40,7 | 5  | 5  | 9,9896 | 0 | 49,369 | 3398300000  | 59   | 1,852 |
| PKM      | Pyruvate kinase PKM                                               | P14618 | 36,3 | 36,3 | 16 | 16 | 57,936 | 0 | 323,31 | 4856900000  | 176  | 0,171 |
| HSP90B1  | Endoplasmin                                                       | P14625 | 19,2 | 19,2 | 10 | 10 | 92,468 | 0 | 101,07 | 1161600000  | 53   | 1,548 |
| RAC2     | Ras-related C3 botulinum toxin substrate 2                        | P15153 | 50   | 31,2 | 8  | 5  | 21,429 | 0 | 57,846 | 1216400000  | 35   | 1,852 |
| SELP     | P-selectin                                                        | P16109 | 24,2 | 24,2 | 14 | 14 | 90,833 | 0 | 282,11 | 3127500000  | 141  | 0,041 |
| PECAM1   | Platelet endothelial cell adhesion molecule                       | P16284 | 32,2 | 32,2 | 16 | 16 | 82,535 | 0 | 323,31 | 4123400000  | 173  | 0,132 |
| CD36     | Platelet glycoprotein 4                                           | P16671 | 21,4 | 21,4 | 9  | 9  | 53,053 | 0 | 255,93 | 3492500000  | 144  | 0,884 |
| ITGA2    | Integrin alpha-2                                                  | P17301 | 9,6  | 9,6  | 8  | 8  | 129,29 | 0 | 66,787 | 472350000   | 45   | 1,852 |
| VCL      | Vinculin                                                          | P18206 | 32,9 | 32,9 | 28 | 28 | 123,8  | 0 | 323,31 | 11313000000 | 279  | 0,336 |
| CSRP1    | Cysteine and glycine-rich protein 1                               | P21291 | 49,2 | 49,2 | 7  | 7  | 20,567 | 0 | 133,6  | 1308800000  | 52   | 0,426 |
| FLNA     | Filamin-A                                                         | P21333 | 39,9 | 39,9 | 82 | 82 | 280,74 | 0 | 323,31 | 64097000000 | 1162 | 0,021 |
| CD9      | CD9 antigen                                                       | P21926 | 26,8 | 26,8 | 9  | 9  | 25,416 | 0 | 323,31 | 10802000000 | 155  | 0,131 |

|          |                                                                 |        |      |      |    |    |        |          |        |             |     |       |
|----------|-----------------------------------------------------------------|--------|------|------|----|----|--------|----------|--------|-------------|-----|-------|
| *UBA1    | Ubiquitin-like modifier-activating enzyme 1                     | P22314 | 3,7  | 3,7  | 2  | 2  | 117,85 | 0        | 12,536 | 83741000    | 10  | 2,140 |
| NME2     | Nucleoside diphosphate kinase B                                 | P22392 | 24,3 | 24,3 | 3  | 3  | 17,298 | 0        | 17,86  | 160020000   | 12  | 1,852 |
| ITGA6    | Integrin alpha-6                                                | P23229 | 22,7 | 22,7 | 19 | 19 | 126,6  | 0        | 253,88 | 3061100000  | 118 | 0,449 |
| PPIB     | Peptidyl-prolyl cis-trans isomerase B                           | P23284 | 52,3 | 52,3 | 8  | 8  | 23,742 | 0        | 67,819 | 1382700000  | 62  | 1,148 |
| CFL1     | Cofilin-1                                                       | P23528 | 75,9 | 68,7 | 20 | 17 | 18,502 | 0        | 323,31 | 29829000000 | 449 | 0,020 |
| MYL9     | Myosin regulatory light polypeptide 9                           | P24844 | 8,1  | 8,1  | 2  | 2  | 19,827 | 0        | 50,297 | 375660000   | 26  | 1,906 |
| *ATP5A1  | ATP synthase subunit alpha, mitochondrial                       | P25705 | 20,6 | 20,6 | 8  | 8  | 59,75  | 0        | 188,37 | 928910000   | 57  | 1,852 |
| MSN      | Moesin                                                          | P26038 | 32,2 | 32,2 | 17 | 17 | 67,819 | 0        | 323,31 | 3374700000  | 159 | 0,246 |
| S100A4   | Protein S100-A4                                                 | P26447 | 33,7 | 33,7 | 4  | 4  | 11,728 | 0        | 86,299 | 2056700000  | 71  | 1,201 |
| STOM     | Erythrocyte band 7 integral membrane protein                    | P27105 | 48,6 | 48,6 | 10 | 10 | 31,73  | 0        | 323,31 | 13275000000 | 177 | 0,041 |
| YWHAQ    | 14-3-3 protein theta                                            | P27348 | 20,8 | 20,8 | 3  | 3  | 27,764 | 0        | 45,917 | 524190000   | 22  | 1,427 |
| CALR     | Calreticulin                                                    | P27797 | 26,4 | 26,4 | 7  | 7  | 48,141 | 0        | 54,253 | 487370000   | 26  | 1,852 |
| CANX     | Calnexin                                                        | P27824 | 16,9 | 16,9 | 4  | 4  | 67,567 | 0        | 29,614 | 275360000   | 6   | 1,472 |
| *PRDX5   | Peroxiredoxin-5, mitochondrial                                  | P30044 | 39,3 | 39,3 | 4  | 4  | 22,086 | 0        | 86,248 | 528580000   | 28  | 2,828 |
| PDIA3    | Protein disulfide-isomerase A3                                  | P30101 | 41,2 | 41,2 | 13 | 13 | 56,782 | 0        | 201,77 | 3119000000  | 131 | 0,287 |
| FCER1G   | High affinity immunoglobulin epsilon receptor subunit gamma     | P30273 | 23,3 | 23,3 | 1  | 1  | 9,6674 | 0        | 17,64  | 337760000   | 20  | 1,897 |
| *PPIF    | Peptidyl-prolyl cis-trans isomerase F, mitochondrial            | P30405 | 39,1 | 39,1 | 6  | 6  | 22,04  | 0        | 60,092 | 567640000   | 36  | 1,557 |
| SERPINB1 | Leukocyte elastase inhibitor                                    | P30740 | 37,2 | 37,2 | 8  | 8  | 42,741 | 0        | 159,45 | 1357600000  | 71  | 0,710 |
| CORO1A   | Coronin-1A                                                      | P31146 | 23   | 21,3 | 8  | 7  | 51,026 | 0        | 74,602 | 1384500000  | 51  | 1,852 |
| YWHAB    | 14-3-3 protein beta/alpha                                       | P31946 | 35   | 23,2 | 6  | 3  | 28,082 | 0        | 94,606 | 705070000   | 16  | 1,852 |
| MYH9     | Myosin-9                                                        | P35579 | 41,3 | 41,3 | 69 | 69 | 226,53 | 0        | 323,31 | 16397000000 | 691 | 0,033 |
| PGM1     | Phosphoglucomutase-1                                            | P36871 | 9,3  | 9,3  | 3  | 3  | 61,448 | 0        | 39,293 | 223720000   | 18  | 2,828 |
| TAGLN2   | Transgelin-2                                                    | P37802 | 48,7 | 48,7 | 7  | 7  | 22,391 | 0        | 116,2  | 1182700000  | 60  | 0,682 |
| TALDO1   | Transaldolase                                                   | P37837 | 18,4 | 18,4 | 5  | 5  | 37,54  | 0        | 54,294 | 251310000   | 12  | 1,988 |
| SNCA     | Alpha-synuclein                                                 | P37840 | 26,4 | 26,4 | 4  | 4  | 14,46  | 0        | 38,563 | 221350000   | 14  | 1,901 |
| MDH1     | Malate dehydrogenase, cytoplasmic                               | P40925 | 15,9 | 15,9 | 3  | 3  | 36,426 | 0        | 43,987 | 296820000   | 17  | 1,893 |
| *MDH2    | Malate dehydrogenase, mitochondrial                             | P40926 | 22,8 | 22,8 | 4  | 4  | 35,503 | 0        | 30,317 | 397060000   | 27  | 1,296 |
| CSK      | Tyrosine-protein kinase CSK                                     | P41240 | 5,3  | 5,3  | 2  | 2  | 50,704 | 0,002874 | 11,04  | 80199000    | 6   | 1,852 |
| CAPZB    | F-actin-capping protein subunit beta                            | P47756 | 34,3 | 34,3 | 6  | 6  | 31,35  | 0        | 126,42 | 654440000   | 19  | 1,178 |
| LIMS1    | LIM and senescent cell antigen-like-containing domain protein 1 | P48059 | 72,3 | 72,3 | 21 | 21 | 37,251 | 0        | 323,31 | 6846200000  | 210 | 0,267 |
| PIP4K2A  | Phosphatidylinositol 5-phosphate 4-kinase type-2 alpha          | P48426 | 5,2  | 5,2  | 2  | 2  | 46,224 | 0        | 19,288 | 161360000   | 7   | 1,852 |
| CD151    | CD151 antigen                                                   | P48509 | 6,7  | 6,7  | 1  | 1  | 28,295 | 0        | 35,426 | 520950000   | 30  | 1,852 |
| CCT5     | T-complex protein 1 subunit epsilon                             | P48643 | 13,1 | 13,1 | 5  | 5  | 59,67  | 0        | 54,232 | 286930000   | 17  | 1,852 |
| *IDH2    | Isocitrate dehydrogenase [NADP], mitochondrial                  | P48735 | 36,9 | 36,9 | 10 | 10 | 50,909 | 0        | 99,902 | 1093000000  | 57  | 1,852 |
| ARRB1    | Beta-arrestin-1                                                 | P49407 | 6,5  | 6,5  | 3  | 3  | 47,065 | 0        | 25,488 | 312370000   | 20  | 2,146 |
| GNAQ     | Guanine nucleotide-binding protein G(q) subunit alpha           | P50148 | 10,3 | 10,3 | 4  | 4  | 42,142 | 0        | 58,867 | 592940000   | 25  | 1,852 |
| VASP     | Vasodilator-stimulated phosphoprotein                           | P50552 | 18,9 | 18,9 | 6  | 6  | 39,829 | 0        | 67,652 | 3290000000  | 73  | 1,023 |
| RAB7A    | Ras-related protein Rab-7a                                      | P51149 | 48,8 | 48,8 | 9  | 9  | 23,489 | 0        | 57,722 | 774510000   | 43  | 1,550 |
| RAB13    | Ras-related protein Rab-13                                      | P51153 | 31   | 25,6 | 4  | 3  | 22,774 | 0        | 42,552 | 266730000   | 16  | 1,991 |
| PGD      | 6-phosphogluconate dehydrogenase, decarboxylating               | P52209 | 5,4  | 5,4  | 3  | 3  | 53,139 | 0        | 16,249 | 183850000   | 8   | 2,828 |

|            |                                                                    |        |      |      |    |    |        |   |        |             |      |       |
|------------|--------------------------------------------------------------------|--------|------|------|----|----|--------|---|--------|-------------|------|-------|
| ARHGDIB    | Rho GDP-dissociation inhibitor 2                                   | P52566 | 28,4 | 28,4 | 3  | 3  | 22,988 | 0 | 47,748 | 609320000   | 33   | 1,112 |
| CAPZA1     | F-actin-capping protein subunit alpha-1                            | P52907 | 23,1 | 19,6 | 4  | 3  | 32,922 | 0 | 37,334 | 511210000   | 26   | 1,418 |
| PTTG1IP    | Pituitary tumor-transforming gene 1 protein-interacting protein    | P53801 | 18,9 | 18,9 | 2  | 2  | 20,324 | 0 | 70,361 | 548090000   | 24   | 1,133 |
| NAPA       | Alpha-soluble NSF attachment protein                               | P54920 | 10,5 | 10,5 | 2  | 2  | 33,232 | 0 | 40,686 | 186940000   | 12   | 2,828 |
| VCP        | Transitional endoplasmic reticulum ATPase                          | P55072 | 27,4 | 27,4 | 12 | 12 | 89,321 | 0 | 169,34 | 979700000   | 53   | 1,852 |
| NAP1L1     | Nucleosome assembly protein 1-like 1                               | P55209 | 13   | 13   | 3  | 3  | 45,374 | 0 | 21,615 | 593800000   | 17   | 1,852 |
| MTPN       | Myotrophin                                                         | P58546 | 36,4 | 36,4 | 4  | 4  | 12,895 | 0 | 54,981 | 1009300000  | 54   | 0,787 |
| TPI1       | Triosephosphate isomerase                                          | P60174 | 44,8 | 44,8 | 7  | 7  | 30,791 | 0 | 224,42 | 1902700000  | 95   | 1,041 |
| MYL6       | Myosin light polypeptide 6                                         | P60660 | 47,7 | 47,7 | 4  | 4  | 16,93  | 0 | 209,4  | 2393700000  | 100  | 0,179 |
| ACTB       | Actin, cytoplasmic 1                                               | P60709 | 73,9 | 4,5  | 34 | 1  | 41,736 | 0 | 323,31 | 2,252E+11   | 1411 | 0,009 |
| CDC42      | Cell division control protein 42 homolog                           | P60953 | 38,7 | 33   | 7  | 6  | 21,258 | 0 | 64,215 | 890700000   | 62   | 1,852 |
| RAB8A      | Ras-related protein Rab-8A                                         | P61006 | 29   | 23,7 | 5  | 4  | 23,668 | 0 | 108,23 | 842730000   | 39   | 1,852 |
| RAB10      | Ras-related protein Rab-10                                         | P61026 | 37,5 | 32   | 6  | 5  | 22,541 | 0 | 167,84 | 1563800000  | 44   | 1,852 |
| RAB14      | Ras-related protein Rab-14                                         | P61106 | 51,2 | 51,2 | 8  | 8  | 23,897 | 0 | 87,784 | 507820000   | 37   | 2,148 |
| ACTR3      | Actin-related protein 3                                            | P61158 | 31,6 | 31,6 | 8  | 8  | 47,371 | 0 | 143,45 | 3690000000  | 91   | 0,490 |
| ACTR2      | Actin-related protein 2                                            | P61160 | 44,4 | 44,4 | 12 | 12 | 44,76  | 0 | 142,71 | 1586200000  | 76   | 1,562 |
| RAP1B      | Ras-related protein Rap-1b                                         | P61224 | 74,5 | 36,4 | 12 | 4  | 20,825 | 0 | 323,31 | 8786700000  | 142  | 0,390 |
| RAP2B      | Ras-related protein Rap-2b                                         | P61225 | 44,3 | 44,3 | 5  | 5  | 20,504 | 0 | 34,731 | 286040000   | 13   | 2,828 |
| RHOA       | Transforming protein RhoA                                          | P61586 | 23,3 | 23,3 | 5  | 5  | 21,768 | 0 | 71,655 | 1087900000  | 71   | 0,898 |
| HSPE1-MOB4 | 10 kDa heat shock protein, mitochondrial                           | S4R3N1 | 13,8 | 13,8 | 2  | 2  | 29,736 | 0 | 24,375 | 394110000   | 28   | 1,852 |
| B2M        | Beta-2-microglobulin                                               | P61769 | 71,4 | 71,4 | 6  | 6  | 13,714 | 0 | 225,7  | 4921000000  | 112  | 0,441 |
| GNG11      | Guanine nucleotide-binding protein G(I)/G(S)/G(O) subunit gamma-11 | P61952 | 35,6 | 35,6 | 2  | 2  | 8,4807 | 0 | 21,497 | 609480000   | 25   | 2,153 |
| YWHAG      | 14-3-3 protein gamma                                               | P61981 | 37,7 | 32,4 | 9  | 6  | 28,302 | 0 | 170,59 | 2140800000  | 109  | 0,251 |
| YWHAE      | 14-3-3 protein epsilon                                             | P62258 | 37,3 | 37,3 | 7  | 7  | 29,174 | 0 | 117,89 | 1919100000  | 90   | 1,196 |
| TMSB4X     | Thymosin beta-4                                                    | P62328 | 84,1 | 84,1 | 4  | 4  | 5,0526 | 0 | 52,184 | 10489000000 | 113  | 0,689 |
| RAB11A     | Ras-related protein Rab-11A                                        | P62491 | 26,4 | 26,4 | 5  | 5  | 24,393 | 0 | 133    | 2370600000  | 75   | 1,146 |
| RAB1A      | Ras-related protein Rab-1A                                         | P62820 | 26,3 | 21   | 5  | 3  | 22,677 | 0 | 52,433 | 618810000   | 28   | 1,242 |
| RAN        | GTP-binding nuclear protein Ran                                    | P62826 | 17,1 | 17,1 | 3  | 3  | 24,423 | 0 | 18,886 | 153890000   | 15   | 1,997 |
| GNB1       | Guanine nucleotide-binding protein G(I)/G(S)/G(T) subunit beta-1   | P62873 | 27,6 | 27,6 | 4  | 4  | 37,377 | 0 | 234,28 | 899800000   | 32   | 0,954 |
| PPIA       | Peptidyl-prolyl cis-trans isomerase A                              | P62937 | 97,6 | 97,6 | 17 | 17 | 18,012 | 0 | 323,31 | 15969000000 | 293  | 0,023 |
| FKBP1A     | Peptidyl-prolyl cis-trans isomerase FKBP1A                         | P62942 | 32,4 | 32,4 | 3  | 3  | 11,951 | 0 | 34,729 | 322690000   | 22   | 2,828 |
| RAC1       | Ras-related C3 botulinum toxin substrate 1                         | P63000 | 49,5 | 30,7 | 9  | 6  | 21,45  | 0 | 121,01 | 2157900000  | 78   | 1,852 |
| YWHAZ      | 14-3-3 protein zeta/delta                                          | P63104 | 55,5 | 55,5 | 16 | 16 | 27,745 | 0 | 323,31 | 21058000000 | 312  | 0,027 |
| EIF5A      | Eukaryotic translation initiation factor 5A-1                      | P63241 | 49,4 | 49,4 | 5  | 5  | 16,832 | 0 | 115,86 | 633820000   | 41   | 1,852 |
| ACTG1      | Actin, cytoplasmic 2                                               | P63261 | 73,9 | 4,5  | 34 | 1  | 41,792 | 0 | 164,44 | 16231000000 | 74   | 1,545 |
| TPM4       | Tropomyosin alpha-4 chain                                          | P67936 | 57,7 | 34,3 | 14 | 10 | 28,521 | 0 | 323,31 | 7515600000  | 188  | 0,288 |
| ACTC1      | Actin, alpha cardiac muscle 1                                      | P68032 | 60,2 | 26,3 | 26 | 6  | 42,019 | 0 | 155,18 | 27357000000 | 155  | 0,123 |
| TUBA1B     | Tubulin alpha-1B chain                                             | P68363 | 43   | 0    | 12 | 0  | 50,151 | 0 | 316,28 | 9209300000  | 200  | 0,043 |
| TUBA4A     | Tubulin alpha-4A chain                                             | P68366 | 44,2 | 11,4 | 12 | 3  | 49,924 | 0 | 78,142 | 1082900000  | 39   | 2,828 |
| TUBB4B     | Tubulin beta-4B chain                                              | P68371 | 57,8 | 16,4 | 13 | 3  | 49,83  | 0 | 164,21 | 828150000   | 35   | 1,097 |
| HBB        | Hemoglobin subunit beta                                            | P68871 | 57,8 | 57,8 | 7  | 7  | 15,998 | 0 | 106,97 | 2505400000  | 72   | 1,854 |
| HBA1       | Hemoglobin subunit alpha                                           | P69905 | 75,4 | 75,4 | 8  | 8  | 15,257 | 0 | 223,13 | 2793900000  | 93   | 1,071 |
| GSTO1      | Glutathione S-transferase omega-1                                  | P78417 | 47,3 | 47,3 | 8  | 8  | 27,566 | 0 | 100,6  | 870800000   | 41   | 1,852 |

|          |                                                          |        |      |      |    |    |        |   |        |             |     |       |
|----------|----------------------------------------------------------|--------|------|------|----|----|--------|---|--------|-------------|-----|-------|
| DCD      | Dermcidin                                                | P81605 | 33,6 | 33,6 | 3  | 3  | 11,284 | 0 | 36,066 | 300390000   | 12  | 1,983 |
| MPP1     | 55 kDa erythrocyte membrane protein                      | Q00013 | 6    | 6    | 2  | 2  | 52,296 | 0 | 23,076 | 271200000   | 17  | 1,852 |
| CAP1     | Adenylyl cyclase-associated protein 1                    | Q01518 | 63,6 | 63,6 | 24 | 24 | 51,901 | 0 | 323,31 | 8098900000  | 233 | 0,232 |
| YWHAH    | 14-3-3 protein eta                                       | Q04917 | 31,7 | 26,4 | 7  | 5  | 28,218 | 0 | 118,48 | 1019200000  | 44  | 1,425 |
| CALD1    | Caldesmon                                                | Q05682 | 3,9  | 3,9  | 2  | 2  | 93,23  | 0 | 31,462 | 79699000    | 10  | 1,985 |
| ARHGAP1  | Rho GTPase-activating protein 1                          | Q07960 | 15,5 | 15,5 | 4  | 4  | 50,435 | 0 | 26,932 | 281120000   | 15  | 2,828 |
| CD47     | Leukocyte surface antigen CD47                           | Q08722 | 7,7  | 7,7  | 3  | 3  | 35,213 | 0 | 55,455 | 912910000   | 26  | 1,897 |
| NEXN     | Nexilin                                                  | Q0ZGT2 | 6,2  | 6,2  | 3  | 3  | 80,657 | 0 | 74,204 | 239490000   | 18  | 2,132 |
| PTPRJ    | Receptor-type tyrosine-protein phosphatase eta           | Q12913 | 11,3 | 11,3 | 9  | 9  | 145,94 | 0 | 92,131 | 1753400000  | 94  | 1,037 |
| MMRN1    | Multimerin-1                                             | Q13201 | 16,9 | 16,9 | 16 | 16 | 138,11 | 0 | 323,31 | 4880600000  | 210 | 0,613 |
| ILK      | Integrin-linked protein kinase                           | Q13418 | 47,3 | 47,3 | 17 | 17 | 51,419 | 0 | 323,31 | 15008000000 | 354 | 0,019 |
| COTL1    | Coactosin-like protein                                   | Q14019 | 35,9 | 35,9 | 5  | 5  | 15,945 | 0 | 271,1  | 4004100000  | 130 | 0,027 |
| SEPT11   | Septin-11                                                | Q9NVA2 | 10,7 | 10,7 | 3  | 3  | 49,398 | 0 | 52,242 | 244980000   | 17  | 1,910 |
| RASA3    | Ras GTPase-activating protein 3                          | Q14644 | 14,9 | 14,9 | 9  | 9  | 95,698 | 0 | 75,869 | 854840000   | 49  | 1,202 |
| LTBP1    | Latent-transforming growth factor beta-binding protein 1 | Q14766 | 2,3  | 2,3  | 3  | 3  | 186,79 | 0 | 40,787 | 748040000   | 33  | 1,852 |
| RSU1     | Ras suppressor protein 1                                 | Q15404 | 63,9 | 63,9 | 10 | 10 | 31,54  | 0 | 323,31 | 4073600000  | 96  | 0,470 |
| MAPRE2   | Microtubule-associated protein RP/EB family member 2     | Q15555 | 20,8 | 20,8 | 6  | 6  | 37,031 | 0 | 87,718 | 1234800000  | 57  | 1,097 |
| MAPRE1   | Microtubule-associated protein RP/EB family member 1     | Q15691 | 25,7 | 25,7 | 5  | 5  | 29,999 | 0 | 110,02 | 652860000   | 34  | 1,852 |
| STXBP2   | Syntaxin-binding protein 2                               | Q15833 | 39,1 | 39,1 | 17 | 17 | 66,452 | 0 | 228,42 | 1568400000  | 97  | 0,942 |
| ZYX      | Zyxin                                                    | Q15942 | 17,3 | 17,3 | 5  | 5  | 61,277 | 0 | 234,29 | 2544700000  | 53  | 0,973 |
| UGP2     | UTP--glucose-1-phosphate uridylyltransferase             | Q16851 | 17,1 | 17,1 | 6  | 6  | 56,94  | 0 | 49,297 | 320750000   | 26  | 1,985 |
| CYFIP1   | Cytoplasmic FMR1-interacting protein 1                   | Q7L576 | 13,6 | 8,9  | 15 | 9  | 145,18 | 0 | 122,73 | 806710000   | 51  | 1,852 |
| FERMT3   | Fermitin family homolog 3                                | Q86UX7 | 39,6 | 39,6 | 21 | 21 | 75,952 | 0 | 323,31 | 12073000000 | 301 | 0,031 |
| ABI1     | Abl interactor 1                                         | Q8IZP0 | 16,9 | 16,9 | 4  | 4  | 55,08  | 0 | 152,2  | 454370000   | 31  | 1,902 |
| TSPAN14  | Tetraspanin-14                                           | Q8NG11 | 9,3  | 9,3  | 2  | 2  | 30,69  | 0 | 17,919 | 1003100000  | 28  | 2,135 |
| *SLC44A1 | Choline transporter-like protein 1                       | Q8WWI5 | 6,7  | 6,7  | 4  | 4  | 73,301 | 0 | 39,072 | 342680000   | 26  | 1,852 |
| ATP2A3   | Sarcoplasmic/endoplasmic reticulum calcium ATPase 3      | Q93084 | 12,5 | 7,3  | 7  | 4  | 113,98 | 0 | 83,203 | 735120000   | 29  | 0,960 |
| SYTL4    | Synaptotagmin-like protein 4                             | Q96C24 | 13   | 13   | 9  | 9  | 76,023 | 0 | 61,017 | 339410000   | 33  | 1,852 |
| CNN2     | Calponin-2                                               | Q99439 | 29,4 | 29,4 | 5  | 5  | 33,697 | 0 | 63,979 | 892600000   | 57  | 0,550 |
| *PARK7   | Protein deglycase DJ-1                                   | Q99497 | 38,1 | 38,1 | 4  | 4  | 19,891 | 0 | 44,009 | 548190000   | 15  | 1,902 |
| MGLL     | Monoglyceride lipase                                     | Q99685 | 20,8 | 20,8 | 4  | 4  | 33,261 | 0 | 53,996 | 252230000   | 24  | 1,852 |
| RAB1B    | Ras-related protein Rab-1B                               | Q9H0U4 | 39,8 | 34,3 | 7  | 5  | 22,171 | 0 | 86,673 | 3132900000  | 90  | 0,133 |
| SH3BGRL3 | SH3 domain-binding glutamic acid-rich-like protein 3     | Q9H299 | 32,3 | 32,3 | 2  | 2  | 10,438 | 0 | 40,641 | 6193100000  | 58  | 1,852 |
| TUBB1    | Tubulin beta-1 chain                                     | Q9H4B7 | 65,2 | 65,2 | 16 | 15 | 50,326 | 0 | 323,31 | 7111000000  | 181 | 0,242 |
| EHD1     | EH domain-containing protein 1                           | Q9H4M9 | 37,3 | 25,1 | 15 | 10 | 60,626 | 0 | 296,07 | 3310000000  | 117 | 1,196 |
| PARVB    | Beta-parvin                                              | Q9HBI1 | 28,6 | 28,6 | 10 | 10 | 41,714 | 0 | 323,31 | 5131400000  | 135 | 1,481 |
| PDLIM7   | PDZ and LIM domain protein 7                             | Q9NR12 | 11,2 | 11,2 | 4  | 4  | 49,844 | 0 | 34,69  | 194870000   | 18  | 2,129 |
| SAR1A    | GTP-binding protein SAR1a                                | Q9NR31 | 41,9 | 41,9 | 5  | 5  | 22,367 | 0 | 64,174 | 405830000   | 20  | 1,903 |
| EHD3     | EH domain-containing protein 3                           | Q9NZN3 | 35,1 | 23,2 | 15 | 10 | 60,886 | 0 | 151,39 | 1532200000  | 55  | 1,458 |
| DBNL     | Drebrin-like protein                                     | Q9UJU6 | 11,2 | 11,2 | 3  | 3  | 48,207 | 0 | 87,811 | 1117900000  | 41  | 1,380 |
| CORO1C   | Coronin-1C                                               | Q9ULV4 | 31,2 | 31,2 | 12 | 12 | 53,248 | 0 | 143,87 | 2117000000  | 108 | 0,495 |
| HPSE     | Heparanase                                               | Q9Y251 | 6,8  | 6,8  | 4  | 4  | 61,148 | 0 | 28,082 | 304000000   | 31  | 1,852 |

|        |                                                  |        |      |      |     |     |        |   |        |            |      |       |
|--------|--------------------------------------------------|--------|------|------|-----|-----|--------|---|--------|------------|------|-------|
|        | Voltage-dependent anion-selective channel        |        |      |      |     |     |        |   |        |            |      |       |
| *VDAC3 | protein 3                                        | Q9Y277 | 27,9 | 27,9 | 6   | 6   | 30,658 | 0 | 79,76  | 585230000  | 41   | 1,852 |
| NCKAP1 | Nck-associated protein 1                         | Q9Y2A7 | 7,5  | 7,5  | 7   | 7   | 128,79 | 0 | 76,591 | 325350000  | 19   | 2,143 |
| TLN1   | Talin-1                                          | Q9Y490 | 63,4 | 63,4 | 136 | 136 | 269,76 | 0 | 323,31 | 2,0892E+11 | 2307 | 0,018 |
| F11R   | Junctional adhesion molecule A                   | Q9Y624 | 20,1 | 20,1 | 4   | 4   | 32,583 | 0 | 129,47 | 1886600000 | 93   | 0,226 |
| STK24  | Serine/threonine-protein kinase 24               | Q9Y6E0 | 14,2 | 14,2 | 4   | 4   | 49,307 | 0 | 28,993 | 269000000  | 18   | 1,852 |
| WASF2  | Wiskott-Aldrich syndrome protein family member 2 | Q9Y6W5 | 10,2 | 10,2 | 4   | 4   | 54,283 | 0 | 27,88  | 287290000  | 24   | 1,905 |

\*mitochondrial protein
