# Supplementary material for: Platelet-Derived Microparticles From Obese Individuals: Characterization of Number, Size, Proteomics, and Crosstalk With Cancer and Endothelial Cells
Source: PubMed Central journal article supplement (PMC6349702; doi:10.3389/fphar.2019.00007), 2019-01-22
Supplement: Table_2.pdf [file Table_2.pdf]

## Supplementary Table 2

| Gene names     | Protein names                      | Protein IDs | Unique Proteins   | P value | Fold change | Difference |
|----------------|------------------------------------|-------------|-------------------|---------|-------------|------------|
| <b>CANX</b>    | calnexin                           | P27824      | Unique in healthy |         |             |            |
|                | cGMP-specific 3,5-cyclic           |             |                   |         |             |            |
| <b>PDE5A</b>   | phosphodiesterase                  | O76074      | Unique in healthy |         |             |            |
| <b>CSK</b>     | Tyrosine-protein kinase CSK        | P41240      | Unique in Obese   |         |             |            |
|                | Glutathione reductase,             |             |                   |         |             |            |
| <b>*GSR</b>    | mitochondrial                      | P00390      | Unique in Obese   |         |             |            |
|                | ubiquitin like modifier activating |             |                   |         |             |            |
| <b>*UBA1</b>   | enzyme 1                           | P22314      | Unique in Obese   |         |             |            |
| <b>F5</b>      | Coagulation factor V               | P12259      |                   | 0,0079  | 3,635       | 1,862      |
| <b>PF4V1</b>   | Platelet factor 4 variant          | P10720      |                   | 0,0277  | 4,938       | 2,304      |
| <b>PPBP</b>    | Platelet basic protein             | P02775      |                   | 0,0016  | 4,102       | 2,036      |
| <b>ACTB</b>    | Actin, cytoplasmic 1               | P60709      |                   | 0,0050  | 0,298       | -1,745     |
| <b>ACTN4</b>   | Alpha-actinin-4                    | O43707      |                   | 0,0063  | 0,294       | -1,768     |
| <b>ACTR3</b>   | Actin-related protein 3            | P61158      |                   | 0,0164  | 0,209       | -2,257     |
| <b>ADH5</b>    | Alcohol dehydrogenase class-3      | P11766      |                   | 0,0276  | 0,397       | -1,334     |
| <b>ALDOA</b>   | Fructose-bisphosphate aldolase A   | P04075      |                   | 0,0318  | 0,294       | -1,768     |
| <b>ARHGDI1</b> | Rho GDP-dissociation inhibitor 2   | P52566      |                   | 0,0386  | 0,179       | -2,485     |
|                | Actin-related protein 2/3 complex  |             |                   |         |             |            |
| <b>ARPC1B</b>  | subunit 1B                         | O15143      |                   | 0,0144  | 0,346       | -1,530     |
| <b>ARRB1</b>   | Beta-arrestin-1                    | P49407      |                   | 0,0234  | 0,411       | -1,284     |
|                | Sarcoplasmic/endoplasmic reticulum |             |                   |         |             |            |
| <b>ATP2A3</b>  | calcium ATPase 3                   | Q93084      |                   | 0,0324  | 0,302       | -1,728     |
| <b>B2M</b>     | Beta-2-microglobulin               | P61769      |                   | 0,0184  | 0,181       | -2,464     |
| <b>CALD1</b>   | Caldesmon                          | Q05682      |                   | 0,0155  | 0,228       | -2,133     |
| <b>CD9</b>     | CD9 antigen                        | P21926      |                   | 0,0101  | 0,269       | -1,894     |
| <b>CFL1</b>    | Cofilin-1                          | P23528      |                   | 0,0085  | 0,398       | -1,331     |
| <b>CNN2</b>    | Calponin-2                         | Q99439      |                   | 0,0014  | 0,173       | -2,531     |
| <b>F11R</b>    | Junctional adhesion molecule A     | Q9Y624      |                   | 0,0059  | 0,367       | -1,445     |
| <b>FERMT3</b>  | Fermitin family homolog 3          | Q86UX7      |                   | 0,0192  | 0,213       | -2,232     |
|                | Glyceraldehyde-3-phosphate         |             |                   |         |             |            |
| <b>GAPDH</b>   | dehydrogenase                      | P04406      |                   | 0,0128  | 0,440       | -1,183     |

|                |                                                                 |        |        |       |        |
|----------------|-----------------------------------------------------------------|--------|--------|-------|--------|
| <b>*GSTP1</b>  | Glutathione S-transferase P                                     | P09211 | 0,0316 | 0,321 | -1,642 |
| <b>HSPA5</b>   | 78 kDa glucose-regulated protein                                | P11021 | 0,0074 | 0,318 | -1,653 |
| <b>ITGA2B</b>  | Integrin alpha-IIb                                              | P08514 | 0,0011 | 0,225 | -2,152 |
| <b>LDHB</b>    | L-lactate dehydrogenase B chain                                 | P07195 | 0,0002 | 0,162 | -2,625 |
| <b>LIMS1</b>   | LIM and senescent cell antigen-like-containing domain protein 1 | P48059 | 0,0034 | 0,196 | -2,350 |
| <b>MDH1</b>    | Malate dehydrogenase, cytoplasmic                               | P40925 | 0,0014 | 0,194 | -2,369 |
| <b>MYL6</b>    | Myosin light polypeptide 6                                      | P60660 | 0,0067 | 0,293 | -1,770 |
| <b>NEXN</b>    | Nexilin                                                         | Q0ZGT2 | 0,0012 | 0,210 | -2,249 |
| <b>PDIA3</b>   | Protein disulfide-isomerase A3                                  | P30101 | 0,0010 | 0,426 | -1,231 |
| <b>PDLIM1</b>  | PDZ and LIM domain protein 1                                    | O00151 | 0,0314 | 0,240 | -2,058 |
| <b>PDLIM7</b>  | PDZ and LIM domain protein 7                                    | Q9NR12 | 0,0162 | 0,397 | -1,334 |
| <b>PIP4K2A</b> | Phosphatidylinositol 5-phosphate 4-kinase type-2 alpha          | P48426 | 0,0061 | 0,321 | -1,638 |
| <b>PKM</b>     | Pyruvate kinase PKM                                             | P14618 | 0,0146 | 0,281 | -1,834 |
| <b>PLEK</b>    | Pleckstrin                                                      | P08567 | 0,0060 | 0,110 | -3,185 |
| <b>PTTG1IP</b> | Pituitary tumor-transforming gene 1 protein-interacting protein | P53801 | 0,0149 | 0,147 | -2,768 |
| <b>RAB13</b>   | Ras-related protein Rab-13                                      | P51153 | 0,0204 | 0,373 | -1,423 |
| <b>RAN</b>     | GTP-binding nuclear protein Ran                                 | P62826 | 0,0106 | 0,244 | -2,037 |
| <b>RHOA</b>    | Transforming protein RhoA                                       | P61586 | 0,0223 | 0,331 | -1,594 |
| <b>SDPR</b>    | Serum deprivation-response protein                              | O95810 | 0,0021 | 0,307 | -1,702 |
| <b>SELP</b>    | P-selectin                                                      | P16109 | 0,0027 | 0,136 | -2,874 |
| <b>STOM</b>    | Erythrocyte band 7 integral membrane protein                    | P27105 | 0,0008 | 0,102 | -3,295 |
| <b>TAGLN2</b>  | Transgelin-2                                                    | P37802 | 0,0061 | 0,259 | -1,952 |
| <b>TPM1</b>    | Tropomyosin alpha-1 chain                                       | P09493 | 0,0026 | 0,506 | -0,983 |
| <b>TUBB</b>    | Tubulin beta chain                                              | P07437 | 0,0031 | 0,212 | -2,236 |

|               |                       |        |        |       |        |
|---------------|-----------------------|--------|--------|-------|--------|
| <b>TUBB4B</b> | Tubulin beta-4B chain | P68371 | 0,0290 | 0,130 | -2,945 |
| <b>TXN</b>    | Thioredoxin           | P10599 | 0,0081 | 0,432 | -1,210 |

**Legend:**

Transmembrane, alpha-granule

In red upregulated proteins

In green downregulated proteins

\*mitochondrial proteins
